# Supplementary material for: Microbiome Profiling Reveals Gut Dysbiosis in the Metabotropic Glutamate Receptor 5 Knockout Mouse Model of Schizophrenia
Source: PubMed Central journal article supplement (PMC7658610; doi:10.3389/fcell.2020.582320), 2020-10-29
Supplement: Image_1.pdf [file Image_1.pdf]

## Supplementary Figure 1

### Microbiome profiling reveals gut dysbiosis in the metabotropic glutamate receptor 5 knockout mouse model of schizophrenia

Gubert et al.

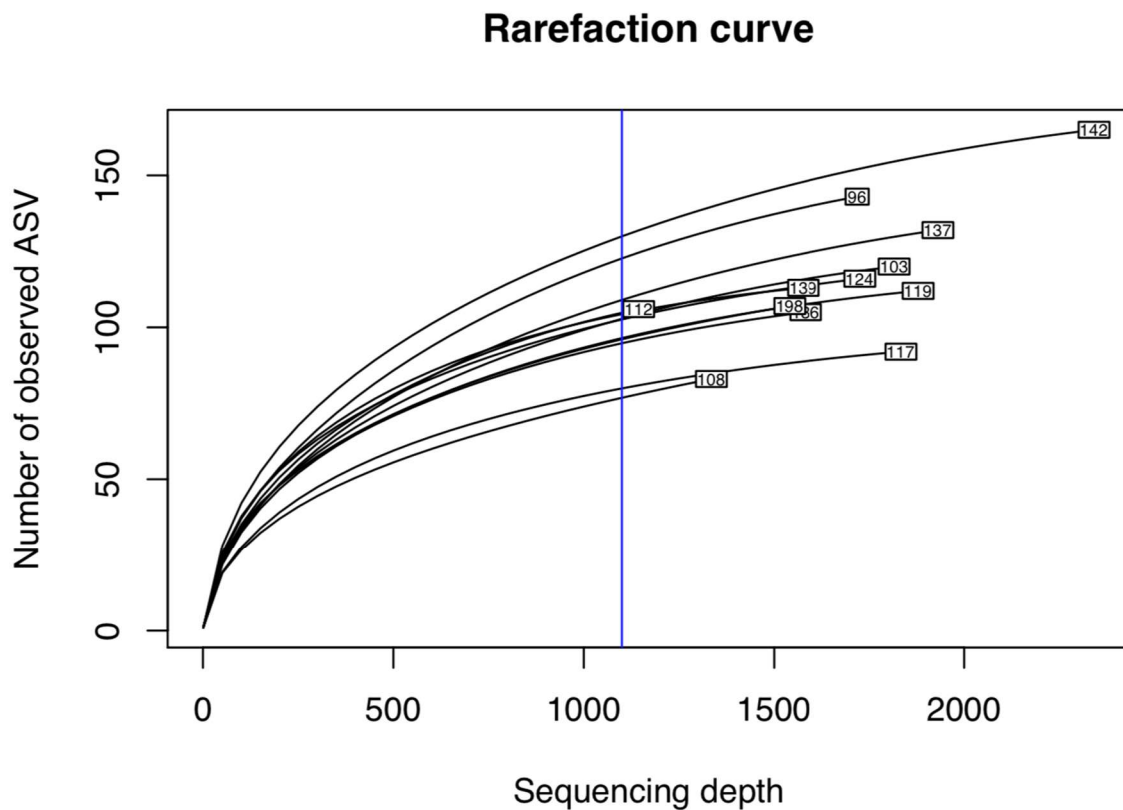

**Suppl. Fig. 1. Alpha rarefaction plot of all samples rarefied to 1,100 reads per sample. It represents species richness as a function of the number of reads (n = 6 for both WT and mGlu5 KO mice groups).**
