# Supplementary material for: Microbiome Profiling Reveals Gut Dysbiosis in the Metabotropic Glutamate Receptor 5 Knockout Mouse Model of Schizophrenia
Source: PubMed Central journal article supplement (PMC7658610; doi:10.3389/fcell.2020.582320), 2020-10-29
Supplement: Image_2.pdf [file Image_2.pdf]

## Supplementary Figure 2

### Microbiome profiling reveals gut dysbiosis in the metabotropic glutamate receptor 5 knockout mouse model of schizophrenia

Gubert et al.

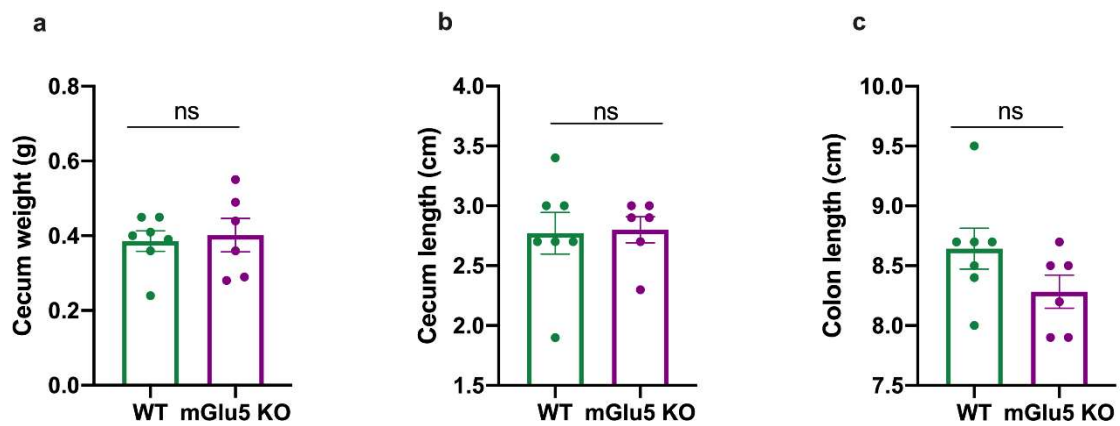

**Suppl. Fig. 2. Gastrointestinal parameters of mGlu5 KO mice.** Macroscopic evaluation of intestine. (a) Cecum weight, (b) cecum length and (c) colon length without normalization by body weight; unpaired t-test. The plots show mean  $\pm$  SEM (n = 6-7 for both WT and mGlu5 KO mice groups). ns  $p > 0.05$ .
