# Supplementary material for: Microbiome Profiling Reveals Gut Dysbiosis in the Metabotropic Glutamate Receptor 5 Knockout Mouse Model of Schizophrenia
Source: PubMed Central journal article supplement (PMC7658610; doi:10.3389/fcell.2020.582320), 2020-10-29
Supplement: Table_1.pdf [file Table_1.pdf]

### Supplementary Table 1

## Microbiome profiling reveals gut dysbiosis in the metabotropic glutamate receptor 5 knockout mouse model of schizophrenia

Gubert et al.

**Suppl. Table 1. Quality control metrics.** Number of sequences (n = 6 for both WT and mGlu5 KO mice groups).

| DMG Number | Submitter ID | Number of Sequences |
|------------|--------------|---------------------|
| DMG1904020 | mGlu5.WT.103 | 77591               |
| DMG1904021 | mGlu5.WT.119 | 80769               |
| DMG1904022 | mGlu5.WT.112 | 58880               |
| DMG1904023 | mGlu5.WT.96  | 77132               |
| DMG1904024 | mGlu5.WT.137 | 84643               |
| DMG1904025 | mGlu5.WT.142 | 105554              |
| DMG1904026 | mGlu5.KO.136 | 68913               |
| DMG1904027 | mGlu5.KO.139 | 67896               |
| DMG1904028 | mGlu5.KO.124 | 78487               |
| DMG1904029 | mGlu5.KO.198 | 75584               |
| DMG1904030 | mGlu5.KO.108 | 63400               |
| DMG1904031 | mGlu5.KO.117 | 73036               |
